# Supplementary material
Source: Research Square preprint supplement (doi:10.21203/rs.3.rs-9906053/v1)
Supplement: Supplementary file 1 [file 71dc7714a9e962113304283f.docx]

| **Category** | **Inclusion** | **Exclusion** |
| --- | --- | --- |
| **Population** | Human participants (healthy adults; older adults; individuals with MCI, subjective cognitive complaints, dementia, or stress-related cognitive impairment; students) | Non-human studies at primary synthesis stage; populations with no cognitive outcome data |
| **Intervention** | Bacopa monnieri extract; Centella asiatica extract; cocoa flavanols; dark chocolate with quantified flavanol content; related bioactives (bacosides, asiaticoside, epicatechin, β-caryophyllene); chocolate-based herbal formulations | Unstandardised whole-food diets without extract characterisation; general dietary pattern studies |
| **Comparator** | Placebo; low-flavanol control; no-treatment / usual care; active comparator nutraceutical interventions; vehicle controls (preclinical) | Single-arm studies without comparator or baseline analysis |
| **Outcomes (Primary)** | Validated cognitive measures: Rey Auditory Verbal Learning Test (AVLT); Trail Making Test A/B; Working memory tasks; Stroop test; Reaction time; Verbal fluency; MMSE / MoCA / global cognition composites | Studies with no cognitive or neurobiological outcome data |
| **Outcomes (Secondary)** | Biological/mechanistic: cerebral blood flow; endothelial function; oxidative stress markers; inflammatory cytokines; BDNF; acetylcholinesterase activity; synaptic proteins; neurogenesis markers |  |
| **Study type** | Randomised controlled trials (RCTs); double-blind placebo-controlled trials; crossover designs with washout. Preclinical (animal / in vitro) for mechanistic synthesis | Narrative reviews; systematic reviews; meta-analyses; case reports; conference abstracts without full data; editorials; non-peer-reviewed sources |
| **Regions** | Global (no geographic restriction) | None |
| **Language** | No language restriction applied | N/A |
| **Time frame** | 1 January 2006 – 23 April 2026 | All beyond the stated scope |
| **Bibliographic databases** | PubMed; MEDLINE (Ovid); Embase (Ovid); Scopus; SCI/Web of Science; Cochrane CENTRAL; CINAHL; Cochrane Library (CLIB); PsycInfo | Grey literature (Google Scholar used as supplementary source only) |

**Table. Population, Intervention, Comparison, Outcome** (**PICO)**
