# Supplementary material
Source: Research Square preprint supplement (doi:10.21203/rs.3.rs-9906053/v1)
Supplement: Supplementary file 2 [file 967beabfabe83e50875e933f.xlsx]

## Sheet: Print (ITT)
Unique ID	ROB2_MM_01	Study ID	Peth-Nui et al., 2012	Assessor	HS
Ref or Label	Peth-Nui et al., 2012	Aim	assignment to intervention (the 'intention-to-treat' effect)
Experimental	Bacopa monnieri	Comparator	Placebo	Source	Journal article(s)
Outcome	Attention and working memory performance (Digit Span Backward, reaction time, attention continuity)	Results	Digit Span Backward: +1.4 (Bacopa) vs +0.2 (placebo); mean difference +1.2 (P < 0.05);	Weight	1
Domain	Signalling question			Response	Comments
Bias arising from the randomization process	1.1 Was the allocation sequence random?			Y
	1.2 Was the allocation sequence concealed until participants were enrolled and assigned to interventions?			Y
	1.3 Did baseline differences between intervention groups suggest a problem with the randomization process?			N
	Risk of bias judgement			Low	Computer-generated randomisation stated; allocation concealed by sealed envelopes; baseline characteristics balanced across groups._x000D_
Bias due to deviations from intended interventions	2.1.Were participants aware of their assigned intervention during the trial?			Y
	2.2.Were carers and people delivering the interventions aware of participants' assigned intervention during the trial?			N
	2.3. If Y/PY/NI to 2.1 or 2.2: Were there deviations from the intended intervention that arose because of the experimental context?			PN
	2.4 If Y/PY to 2.3: Were these deviations likely to have affected the outcome?			NA
	2.5. If Y/PY/NI to 2.4: Were these deviations from intended intervention balanced between groups?			NA
	2.6 Was an appropriate analysis used to estimate the effect of assignment to intervention?			Y
	2.7 If N/PN/NI to 2.6: Was there potential for a substantial impact (on the result) of the failure to analyse participants in the group to which they were randomized?			NA
	Risk of bias judgement			Low	Double-blind; identical capsule appearance; no protocol deviations reported; participants and personnel blinded throughout.
Bias due to missing outcome data	3.1 Were data for this outcome available for all, or nearly all, participants randomized?			Y
	3.2 If N/PN/NI to 3.1: Is there evidence that result was not biased by missing outcome data?			NA
	3.3 If N/PN to 3.2: Could missingness in the outcome depend on its true value?			NA
	3.4 If Y/PY/NI to 3.3: Is it likely that missingness in the outcome depended on its true value?			NA
	Risk of bias judgement			Low	All 60 enrolled participants completed the 12-week trial; complete outcome data reported for all randomised participants.
Bias in measurement of the outcome	4.1 Was the method of measuring the outcome inappropriate?			N
	4.2 Could measurement or ascertainment of the outcome have differed between intervention groups?			N
	4.3 Were outcome assessors aware of the intervention received by study participants?			N
	4.4 If Y/PY/NI to 4.3: Could assessment of the outcome have been influenced by knowledge of intervention received?			NA
	4.5 If Y/PY/NI to 4.4: Is it likely that assessment of the outcome was influenced by knowledge of intervention received?			NA
	Risk of bias judgement			Low	Validated computerised cognitive battery (CTSATR); neurochemical outcomes (AChE, ERP) measured by blinded laboratory staff; outcome measurement identical across groups.
Bias in selection of the reported result	5.1 Were the data that produced this result analysed in accordance with a pre-specified analysis plan that was finalized before unblinded outcome data were available for analysis?			PY
	5.2 ... multiple eligible outcome measurements (e.g. scales, definitions, time points) within the outcome domain?			N
	5.3 ... multiple eligible analyses of the data?			N
	Risk of bias judgement			Some concerns	Pre-specified primary outcomes reported; however neurochemical secondary endpoints were not pre-registered; some selectivity in reporting of 300mg vs 600mg dose comparisons.
Overall bias	Risk of bias judgement			Low	Well-conducted double-blind RCT. Some concerns in Domain 5 (selective reporting of dose-comparison data and unregistered neurochemical endpoints). All other domains low.
Unique ID	ROB2_MM_02	Study ID	Stough et al., 2008	Assessor	HS
Ref or Label	Stough et al., 2008	Aim	assignment to intervention (the 'intention-to-treat' effect)
Experimental	Bacopa monnieri	Comparator	Placebo	Source	Journal article(s)
Outcome	Working memory	Results	Spatial WM accuracy ↑ (P<0.05)	Weight	1
Domain	Signalling question			Response	Comments
Bias arising from the randomization process	1.1 Was the allocation sequence random?			Y
	1.2 Was the allocation sequence concealed until participants were enrolled and assigned to interventions?			PY
	1.3 Did baseline differences between intervention groups suggest a problem with the randomization process?			N
	Risk of bias judgement			Low	Randomisation described; allocation concealment not fully detailed but double-blind design limits risk; baseline groups comparable.
Bias due to deviations from intended interventions	2.1.Were participants aware of their assigned intervention during the trial?			Y
	2.2.Were carers and people delivering the interventions aware of participants' assigned intervention during the trial?			N
	2.3. If Y/PY/NI to 2.1 or 2.2: Were there deviations from the intended intervention that arose because of the experimental context?			N
	2.4 If Y/PY to 2.3: Were these deviations likely to have affected the outcome?			NA
	2.5. If Y/PY/NI to 2.4: Were these deviations from intended intervention balanced between groups?			NA
	2.6 Was an appropriate analysis used to estimate the effect of assignment to intervention?			Y
	2.7 If N/PN/NI to 2.6: Was there potential for a substantial impact (on the result) of the failure to analyse participants in the group to which they were randomized?			NA
	Risk of bias judgement			Low
Bias due to missing outcome data	3.1 Were data for this outcome available for all, or nearly all, participants randomized?			Y
	3.2 If N/PN/NI to 3.1: Is there evidence that result was not biased by missing outcome data?			NA
	3.3 If N/PN to 3.2: Could missingness in the outcome depend on its true value?			NA
	3.4 If Y/PY/NI to 3.3: Is it likely that missingness in the outcome depended on its true value?			NA
	Risk of bias judgement			Low	CONSORT flow diagram provided; 62 completers from 76 enrolled; dropouts balanced and not outcome-related; completer analysis with sensitivity check.
Bias in measurement of the outcome	4.1 Was the method of measuring the outcome inappropriate?			N
	4.2 Could measurement or ascertainment of the outcome have differed between intervention groups?			N
	4.3 Were outcome assessors aware of the intervention received by study participants?			N
	4.4 If Y/PY/NI to 4.3: Could assessment of the outcome have been influenced by knowledge of intervention received?			NA
	4.5 If Y/PY/NI to 4.4: Is it likely that assessment of the outcome was influenced by knowledge of intervention received?			NA
	Risk of bias judgement			Low	Validated CDR computerised battery; blinded assessors; identical assessment procedures across groups.
Bias in selection of the reported result	5.1 Were the data that produced this result analysed in accordance with a pre-specified analysis plan that was finalized before unblinded outcome data were available for analysis?			PN
	5.2 ... multiple eligible outcome measurements (e.g. scales, definitions, time points) within the outcome domain?			PY
	5.3 ... multiple eligible analyses of the data?			N
	Risk of bias judgement			Some concerns	No pre-registered protocol; composite WM factor defined post-hoc in some analyses; primary outcome (working memory) consistently reported.
Overall bias	Risk of bias judgement			Some concerns	Methodologically sound double-blind RCT with validated outcomes. Some concerns in Domain 5 due to absence of pre-registration and post-hoc composite outcome definition.
Unique ID	ROB2_MM_03	Study ID	Calabrese et al., 2008	Assessor	HS
Ref or Label	Calabrese et al., 2008	Aim	assignment to intervention (the 'intention-to-treat' effect)
Experimental	Bacopa monnieri	Comparator	Placebo	Source	Journal article(s)
Outcome	Verbal memory & executive function	Results	AVLT delayed recall ↑ (P≈0.03); Stroop RT ↓ (P≈0.003)	Weight	1
Domain	Signalling question			Response	Comments
Bias arising from the randomization process	1.1 Was the allocation sequence random?			Y
	1.2 Was the allocation sequence concealed until participants were enrolled and assigned to interventions?			Y
	1.3 Did baseline differences between intervention groups suggest a problem with the randomization process?			N
	Risk of bias judgement			Low	Computer-generated randomisation; pharmacy-managed allocation concealment; comparable baseline demographics.
Bias due to deviations from intended interventions	2.1.Were participants aware of their assigned intervention during the trial?			Y
	2.2.Were carers and people delivering the interventions aware of participants' assigned intervention during the trial?			N
	2.3. If Y/PY/NI to 2.1 or 2.2: Were there deviations from the intended intervention that arose because of the experimental context?			N
	2.4 If Y/PY to 2.3: Were these deviations likely to have affected the outcome?			NA
	2.5. If Y/PY/NI to 2.4: Were these deviations from intended intervention balanced between groups?			NA
	2.6 Was an appropriate analysis used to estimate the effect of assignment to intervention?			Y
	2.7 If N/PN/NI to 2.6: Was there potential for a substantial impact (on the result) of the failure to analyse participants in the group to which they were randomized?			NA
	Risk of bias judgement			Low	Double-blind; identical placebo capsules dispensed by pharmacy; no deviations from assigned intervention reported._x000D_
Bias due to missing outcome data	3.1 Were data for this outcome available for all, or nearly all, participants randomized?			Y
	3.2 If N/PN/NI to 3.1: Is there evidence that result was not biased by missing outcome data?			NA
	3.3 If N/PN to 3.2: Could missingness in the outcome depend on its true value?			NA
	3.4 If Y/PY/NI to 3.3: Is it likely that missingness in the outcome depended on its true value?			NA
	Risk of bias judgement			Low	1 dropout reported and fully accounted for; intention-to-treat analysis used; missing data minimal and non-differential._x000D_ _x000D_
Bias in measurement of the outcome	4.1 Was the method of measuring the outcome inappropriate?			N
	4.2 Could measurement or ascertainment of the outcome have differed between intervention groups?			N
	4.3 Were outcome assessors aware of the intervention received by study participants?			N
	4.4 If Y/PY/NI to 4.3: Could assessment of the outcome have been influenced by knowledge of intervention received?			NA
	4.5 If Y/PY/NI to 4.4: Is it likely that assessment of the outcome was influenced by knowledge of intervention received?			NA
	Risk of bias judgement			Low	AVLT and Stroop are validated and objective; neuropsychological assessors blinded to group assignment; standardised administration._x000D_ _x000D_
Bias in selection of the reported result	5.1 Were the data that produced this result analysed in accordance with a pre-specified analysis plan that was finalized before unblinded outcome data were available for analysis?			Y
	5.2 ... multiple eligible outcome measurements (e.g. scales, definitions, time points) within the outcome domain?			N
	5.3 ... multiple eligible analyses of the data?			N
	Risk of bias judgement			Low	Primary outcomes (AVLT, Stroop) pre-specified; all planned outcomes reported; no evidence of selective reporting.
Overall bias	Risk of bias judgement			Low
Unique ID	ROB2_MM_04	Study ID	Raghav_2006	Assessor	HS
Ref or Label	Raghav_2006	Aim	assignment to intervention (the 'intention-to-treat' effect)
Experimental	Bacopa monnieri	Comparator	Placebo	Source	Journal article(s)
Outcome	Memory & executive function	Results	Multiple memory domains ↑ (P<0.05)	Weight	1
Domain	Signalling question			Response	Comments
Bias arising from the randomization process	1.1 Was the allocation sequence random?			NI
	1.2 Was the allocation sequence concealed until participants were enrolled and assigned to interventions?			NI
	1.3 Did baseline differences between intervention groups suggest a problem with the randomization process?			N
	Risk of bias judgement			Some concerns	Described as randomised but method of sequence generation not specified; allocation concealment not described.
Bias due to deviations from intended interventions	2.1.Were participants aware of their assigned intervention during the trial?			Y
	2.2.Were carers and people delivering the interventions aware of participants' assigned intervention during the trial?			N
	2.3. If Y/PY/NI to 2.1 or 2.2: Were there deviations from the intended intervention that arose because of the experimental context?			N
	2.4 If Y/PY to 2.3: Were these deviations likely to have affected the outcome?			NA
	2.5. If Y/PY/NI to 2.4: Were these deviations from intended intervention balanced between groups?			NA
	2.6 Was an appropriate analysis used to estimate the effect of assignment to intervention?			PY
	2.7 If N/PN/NI to 2.6: Was there potential for a substantial impact (on the result) of the failure to analyse participants in the group to which they were randomized?			NA
	Risk of bias judgement			Low	_x000D_ _x000D_ _x000D_ Double-blind stated; identical-appearing capsules; no deviations from intended interventions reported._x000D_ _x000D_
Bias due to missing outcome data	3.1 Were data for this outcome available for all, or nearly all, participants randomized?			Y
	3.2 If N/PN/NI to 3.1: Is there evidence that result was not biased by missing outcome data?			NA
	3.3 If N/PN to 3.2: Could missingness in the outcome depend on its true value?			NA
	3.4 If Y/PY/NI to 3.3: Is it likely that missingness in the outcome depended on its true value?			NA
	Risk of bias judgement			Low	All 35 participants completed; no dropouts reported; complete outcome data for all enrolled participants._x000D_
Bias in measurement of the outcome	4.1 Was the method of measuring the outcome inappropriate?			N
	4.2 Could measurement or ascertainment of the outcome have differed between intervention groups?			N
	4.3 Were outcome assessors aware of the intervention received by study participants?			NI
	4.4 If Y/PY/NI to 4.3: Could assessment of the outcome have been influenced by knowledge of intervention received?			Y
	4.5 If Y/PY/NI to 4.4: Is it likely that assessment of the outcome was influenced by knowledge of intervention received?			PN
	Risk of bias judgement			Some concerns	WMS is a validated instrument; however assessor blinding not explicitly confirmed; some ambiguity about who administered and scored tests.
Bias in selection of the reported result	5.1 Were the data that produced this result analysed in accordance with a pre-specified analysis plan that was finalized before unblinded outcome data were available for analysis?			N
	5.2 ... multiple eligible outcome measurements (e.g. scales, definitions, time points) within the outcome domain?			PY
	5.3 ... multiple eligible analyses of the data?			N
	Risk of bias judgement			Some concerns	No pre-registered protocol; multiple WMS subtests reported selectively; not all planned outcomes clearly pre-specified._x000D_
Overall bias	Risk of bias judgement			Some concerns	Some concerns across Domains 1, 4, and 5 due to unclear randomisation method, uncertain assessor blinding, and absence of pre-registration. Blinding and missing data low risk.
Unique ID	ROB2_MM_05	Study ID	Crosta et al., 2020	Assessor	HS
Ref or Label	Crosta et al., 2020	Aim	assignment to intervention (the 'intention-to-treat' effect)
Experimental	Bacopa + antioxidants	Comparator	Placebo	Source	Journal article(s)
Outcome	Executive function (TMT)	Results	TMT-B −21.0 s (P<0.0001); TMT-A −6.9 s (P<0.0001)	Weight	1
Domain	Signalling question			Response	Comments
Bias arising from the randomization process	1.1 Was the allocation sequence random?			Y
	1.2 Was the allocation sequence concealed until participants were enrolled and assigned to interventions?			Y
	1.3 Did baseline differences between intervention groups suggest a problem with the randomization process?			N
	Risk of bias judgement			Low	Computer-generated randomisation; independent pharmacist managed allocation; baseline characteristics comparable between groups.
Bias due to deviations from intended interventions	2.1.Were participants aware of their assigned intervention during the trial?			Y
	2.2.Were carers and people delivering the interventions aware of participants' assigned intervention during the trial?			N
	2.3. If Y/PY/NI to 2.1 or 2.2: Were there deviations from the intended intervention that arose because of the experimental context?			N
	2.4 If Y/PY to 2.3: Were these deviations likely to have affected the outcome?			NA
	2.5. If Y/PY/NI to 2.4: Were these deviations from intended intervention balanced between groups?			NA
	2.6 Was an appropriate analysis used to estimate the effect of assignment to intervention?			Y
	2.7 If N/PN/NI to 2.6: Was there potential for a substantial impact (on the result) of the failure to analyse participants in the group to which they were randomized?			NA
	Risk of bias judgement			Low	Double-blind; identical capsule appearance and packaging; pharmacist-blinded dispensing; no protocol deviations reported.
Bias due to missing outcome data	3.1 Were data for this outcome available for all, or nearly all, participants randomized?			Y
	3.2 If N/PN/NI to 3.1: Is there evidence that result was not biased by missing outcome data?			NA
	3.3 If N/PN to 3.2: Could missingness in the outcome depend on its true value?			NA
	3.4 If Y/PY/NI to 3.3: Is it likely that missingness in the outcome depended on its true value?			NA
	Risk of bias judgement			Low	78 evaluable from 80 enrolled; 2 dropouts (unrelated to treatment); ITT with LOCF; full CONSORT flow reported.
Bias in measurement of the outcome	4.1 Was the method of measuring the outcome inappropriate?			N
	4.2 Could measurement or ascertainment of the outcome have differed between intervention groups?			N
	4.3 Were outcome assessors aware of the intervention received by study participants?			N
	4.4 If Y/PY/NI to 4.3: Could assessment of the outcome have been influenced by knowledge of intervention received?			NA
	4.5 If Y/PY/NI to 4.4: Is it likely that assessment of the outcome was influenced by knowledge of intervention received?			NA
	Risk of bias judgement			Low	TMT-A/B and verbal fluency are validated standardised assessments; 8-isoprostane assays performed by blinded laboratory; identical procedures across groups.
Bias in selection of the reported result	5.1 Were the data that produced this result analysed in accordance with a pre-specified analysis plan that was finalized before unblinded outcome data were available for analysis?			Y
	5.2 ... multiple eligible outcome measurements (e.g. scales, definitions, time points) within the outcome domain?			N
	5.3 ... multiple eligible analyses of the data?			N
	Risk of bias judgement			Low	Pre-specified statistical analysis plan; primary outcome (TMT-B) pre-registered; all planned primary and secondary outcomes reported including biomarkers.
Overall bias	Risk of bias judgement			Low	High-quality double-blind RCT with pre-registered SAP, robust allocation concealment, blinded assessment, ITT analysis, and complete outcome reporting. All five domains Low.
Unique ID	ROB2_MM_06	Study ID	Cicero et al., 2017	Assessor	HS
Ref or Label	Cicero et al., 2017	Aim	assignment to intervention (the 'intention-to-treat' effect)
Experimental	Bacopa combination	Comparator	Placebo	Source	Journal article(s)
Outcome	Global cognition (MMSE)	Results	MMSE ↑ (P<0.05–0.01)	Weight	1
Domain	Signalling question			Response	Comments
Bias arising from the randomization process	1.1 Was the allocation sequence random?			NI
	1.2 Was the allocation sequence concealed until participants were enrolled and assigned to interventions?			NI
	1.3 Did baseline differences between intervention groups suggest a problem with the randomization process?			N
	Risk of bias judgement			Some concerns	Described as randomised double-blind pilot; randomisation method and allocation concealment procedure not specified in manuscript.
Bias due to deviations from intended interventions	2.1.Were participants aware of their assigned intervention during the trial?			Y
	2.2.Were carers and people delivering the interventions aware of participants' assigned intervention during the trial?			N
	2.3. If Y/PY/NI to 2.1 or 2.2: Were there deviations from the intended intervention that arose because of the experimental context?			N
	2.4 If Y/PY to 2.3: Were these deviations likely to have affected the outcome?			NA
	2.5. If Y/PY/NI to 2.4: Were these deviations from intended intervention balanced between groups?			NA
	2.6 Was an appropriate analysis used to estimate the effect of assignment to intervention?			PY
	2.7 If N/PN/NI to 2.6: Was there potential for a substantial impact (on the result) of the failure to analyse participants in the group to which they were randomized?			NA
	Risk of bias judgement			Low	Double-blind pilot; identical-appearing nutraceutical and placebo; no deviations from treatment described.
Bias due to missing outcome data	3.1 Were data for this outcome available for all, or nearly all, participants randomized?			Y
	3.2 If N/PN/NI to 3.1: Is there evidence that result was not biased by missing outcome data?			NA
	3.3 If N/PN to 3.2: Could missingness in the outcome depend on its true value?			NA
	3.4 If Y/PY/NI to 3.3: Is it likely that missingness in the outcome depended on its true value?			NA
	Risk of bias judgement			Low	All 30 participants completed 8 weeks; no dropouts reported; complete data for all randomised participants.
Bias in measurement of the outcome	4.1 Was the method of measuring the outcome inappropriate?			N
	4.2 Could measurement or ascertainment of the outcome have differed between intervention groups?			N
	4.3 Were outcome assessors aware of the intervention received by study participants?			NI
	4.4 If Y/PY/NI to 4.3: Could assessment of the outcome have been influenced by knowledge of intervention received?			NI
	4.5 If Y/PY/NI to 4.4: Is it likely that assessment of the outcome was influenced by knowledge of intervention received?			PN
	Risk of bias judgement			Some concerns	MMSE is validated; PSQ and SRDS are validated self-report scales; however assessor blinding for MMSE not explicitly confirmed in this pilot.
Bias in selection of the reported result	5.1 Were the data that produced this result analysed in accordance with a pre-specified analysis plan that was finalized before unblinded outcome data were available for analysis?			N
	5.2 ... multiple eligible outcome measurements (e.g. scales, definitions, time points) within the outcome domain?			PY
	5.3 ... multiple eligible analyses of the data?			N
	Risk of bias judgement			Some concerns	Pilot study without pre-registered protocol; AVLT was listed as an outcome but not assessed in this trial; selective reporting of endpoints noted.
Overall bias	Risk of bias judgement			Some concerns	Pilot RCT with some concerns across Domains 1, 4, and 5. Randomisation method unclear; assessor blinding not confirmed; AVLT endpoint listed but not reported.
Unique ID	ROB2_MM_07	Study ID	Morgan & Stevens, 2010	Assessor	HS
Ref or Label	Morgan & Stevens, 2010	Aim	assignment to intervention (the 'intention-to-treat' effect)
Experimental	Bacopa monnieri	Comparator	Placebo	Source	Journal article(s)
Outcome	Episodic memory (AVLT)	Results	AVLT A4–A7 ↑ (P=0.000–0.016)	Weight	1
Domain	Signalling question			Response	Comments
Bias arising from the randomization process	1.1 Was the allocation sequence random?			Y
	1.2 Was the allocation sequence concealed until participants were enrolled and assigned to interventions?			Y
	1.3 Did baseline differences between intervention groups suggest a problem with the randomization process?			N
	Risk of bias judgement			Low	Sealed opaque envelopes; independent pharmacist managed allocation; baseline demographics equivalent across groups.
Bias due to deviations from intended interventions	2.1.Were participants aware of their assigned intervention during the trial?			N
	2.2.Were carers and people delivering the interventions aware of participants' assigned intervention during the trial?			NI
	2.3. If Y/PY/NI to 2.1 or 2.2: Were there deviations from the intended intervention that arose because of the experimental context?			NI
	2.4 If Y/PY to 2.3: Were these deviations likely to have affected the outcome?			NA
	2.5. If Y/PY/NI to 2.4: Were these deviations from intended intervention balanced between groups?			NA
	2.6 Was an appropriate analysis used to estimate the effect of assignment to intervention?			NI
	2.7 If N/PN/NI to 2.6: Was there potential for a substantial impact (on the result) of the failure to analyse participants in the group to which they were randomized?			N
	Risk of bias judgement			Low	Double-blind; matching placebo capsules; pharmacist-blinded dispensing; no protocol deviations documented.
Bias due to missing outcome data	3.1 Were data for this outcome available for all, or nearly all, participants randomized?			Y
	3.2 If N/PN/NI to 3.1: Is there evidence that result was not biased by missing outcome data?			NA
	3.3 If N/PN to 3.2: Could missingness in the outcome depend on its true value?			NA
	3.4 If Y/PY/NI to 3.3: Is it likely that missingness in the outcome depended on its true value?			NA
	Risk of bias judgement			Low	Full CONSORT flow diagram; 81 completers; dropouts balanced (Bacopa n=6, placebo n=3); ITT with last-observation-carried-forward (LOCF).
Bias in measurement of the outcome	4.1 Was the method of measuring the outcome inappropriate?			N
	4.2 Could measurement or ascertainment of the outcome have differed between intervention groups?			N
	4.3 Were outcome assessors aware of the intervention received by study participants?			N
	4.4 If Y/PY/NI to 4.3: Could assessment of the outcome have been influenced by knowledge of intervention received?			NA
	4.5 If Y/PY/NI to 4.4: Is it likely that assessment of the outcome was influenced by knowledge of intervention received?			NA
	Risk of bias judgement			Low	AVLT is a validated and widely used neuropsychological instrument; administered and scored by blinded assessors.
Bias in selection of the reported result	5.1 Were the data that produced this result analysed in accordance with a pre-specified analysis plan that was finalized before unblinded outcome data were available for analysis?			Y
	5.2 ... multiple eligible outcome measurements (e.g. scales, definitions, time points) within the outcome domain?			N
	5.3 ... multiple eligible analyses of the data?			N
	Risk of bias judgement			Low	Primary outcome (AVLT delayed recall) pre-specified and consistently reported; null results for secondary measures (CFT, TMT, MAC-Q) also fully reported.
Overall bias	Risk of bias judgement			Low	High-quality double-blind RCT with robust concealment, blinded assessment, ITT analysis, and complete pre-specified outcome reporting. All five domains Low.
Unique ID	ROB2_MM_08	Study ID	Benson et al., 2014	Assessor	HS
Ref or Label	Benson et al., 2014	Aim	assignment to intervention (the 'intention-to-treat' effect)
Experimental	Bacopa monnieri	Comparator	Placebo	Source	Journal article(s)
Outcome	Executive function under stress	Results	Cognitive performance ↑; cortisol ↓ (P<0.05)	Weight	1
Domain	Signalling question			Response	Comments
Bias arising from the randomization process	1.1 Was the allocation sequence random?			Y
	1.2 Was the allocation sequence concealed until participants were enrolled and assigned to interventions?			Y
	1.3 Did baseline differences between intervention groups suggest a problem with the randomization process?			N
	Risk of bias judgement			Low	Crossover design; order of conditions randomised by independent party; balanced for order effects.
Bias due to deviations from intended interventions	2.1.Were participants aware of their assigned intervention during the trial?			Y
	2.2.Were carers and people delivering the interventions aware of participants' assigned intervention during the trial?			N
	2.3. If Y/PY/NI to 2.1 or 2.2: Were there deviations from the intended intervention that arose because of the experimental context?			NI
	2.4 If Y/PY to 2.3: Were these deviations likely to have affected the outcome?			NA
	2.5. If Y/PY/NI to 2.4: Were these deviations from intended intervention balanced between groups?			NA
	2.6 Was an appropriate analysis used to estimate the effect of assignment to intervention?			NI
	2.7 If N/PN/NI to 2.6: Was there potential for a substantial impact (on the result) of the failure to analyse participants in the group to which they were randomized?			N
	Risk of bias judgement			Low	Double-blind crossover; matching placebo; adequate washout (1 week); no cross-contamination between periods reported.
Bias due to missing outcome data	3.1 Were data for this outcome available for all, or nearly all, participants randomized?			Y
	3.2 If N/PN/NI to 3.1: Is there evidence that result was not biased by missing outcome data?			NA
	3.3 If N/PN to 3.2: Could missingness in the outcome depend on its true value?			NA
	3.4 If Y/PY/NI to 3.3: Is it likely that missingness in the outcome depended on its true value?			NA
	Risk of bias judgement			Low	Acute crossover; all 17 participants completed all 3 conditions; no missing outcome data.
Bias in measurement of the outcome	4.1 Was the method of measuring the outcome inappropriate?			N
	4.2 Could measurement or ascertainment of the outcome have differed between intervention groups?			N
	4.3 Were outcome assessors aware of the intervention received by study participants?			N
	4.4 If Y/PY/NI to 4.3: Could assessment of the outcome have been influenced by knowledge of intervention received?			NA
	4.5 If Y/PY/NI to 4.4: Is it likely that assessment of the outcome was influenced by knowledge of intervention received?			NA
	Risk of bias judgement			Low	MTF is an objective computerised battery; salivary cortisol assayed blind to condition; Bond-Lader VAS used for mood — all validated instruments.
Bias in selection of the reported result	5.1 Were the data that produced this result analysed in accordance with a pre-specified analysis plan that was finalized before unblinded outcome data were available for analysis?			Y
	5.2 ... multiple eligible outcome measurements (e.g. scales, definitions, time points) within the outcome domain?			N
	5.3 ... multiple eligible analyses of the data?			N
	Risk of bias judgement			Low	Primary cognitive and cortisol outcomes pre-specified; all planned outcomes reported; some secondary exploratory mood analyses clearly labelled.
Overall bias	Risk of bias judgement			Low	Well-conducted acute double-blind crossover RCT. All five domains Low. Appropriate randomisation of condition order, adequate washout, complete data, and pre-specified outcomes.
Unique ID	ROB2_MM_09	Study ID	Kumar et al., 2016	Assessor	HS
Ref or Label	Kumar et al., 2016	Aim	assignment to intervention (the 'intention-to-treat' effect)
Experimental	Bacopa monnieri	Comparator	Placebo	Source	Journal article(s)
Outcome	Working memory & attention	Results	WM and attention ↑ (P<0.05)	Weight	1
Domain	Signalling question			Response	Comments
Bias arising from the randomization process	1.1 Was the allocation sequence random?			Y
	1.2 Was the allocation sequence concealed until participants were enrolled and assigned to interventions?			NI
	1.3 Did baseline differences between intervention groups suggest a problem with the randomization process?			N
	Risk of bias judgement			Some concerns	Randomisation sequence stated as computer-generated; allocation concealment process not described.
Bias due to deviations from intended interventions	2.1.Were participants aware of their assigned intervention during the trial?			Y
	2.2.Were carers and people delivering the interventions aware of participants' assigned intervention during the trial?			N
	2.3. If Y/PY/NI to 2.1 or 2.2: Were there deviations from the intended intervention that arose because of the experimental context?			NI
	2.4 If Y/PY to 2.3: Were these deviations likely to have affected the outcome?			NA
	2.5. If Y/PY/NI to 2.4: Were these deviations from intended intervention balanced between groups?			NA
	2.6 Was an appropriate analysis used to estimate the effect of assignment to intervention?			NI
	2.7 If N/PN/NI to 2.6: Was there potential for a substantial impact (on the result) of the failure to analyse participants in the group to which they were randomized?			N
	Risk of bias judgement			Some concerns	Double-blind; identical capsule appearance; 2:1 allocation (Bacopa:placebo); no deviations from protocol reported.
Bias due to missing outcome data	3.1 Were data for this outcome available for all, or nearly all, participants randomized?			Y
	3.2 If N/PN/NI to 3.1: Is there evidence that result was not biased by missing outcome data?			NA
	3.3 If N/PN to 3.2: Could missingness in the outcome depend on its true value?			NA
	3.4 If Y/PY/NI to 3.3: Is it likely that missingness in the outcome depended on its true value?			NA
	Risk of bias judgement			Low	All 60 enrolled students completed 6 weeks; no dropouts; complete data available for all participants.
Bias in measurement of the outcome	4.1 Was the method of measuring the outcome inappropriate?			N
	4.2 Could measurement or ascertainment of the outcome have differed between intervention groups?			N
	4.3 Were outcome assessors aware of the intervention received by study participants?			NI
	4.4 If Y/PY/NI to 4.3: Could assessment of the outcome have been influenced by knowledge of intervention received?			NI
	4.5 If Y/PY/NI to 4.4: Is it likely that assessment of the outcome was influenced by knowledge of intervention received?			PN
	Risk of bias judgement			Some concerns	Validated neuropsychological tests used; assessor blinding not explicitly stated; unclear whether test administrators were aware of group allocation.
Bias in selection of the reported result	5.1 Were the data that produced this result analysed in accordance with a pre-specified analysis plan that was finalized before unblinded outcome data were available for analysis?			N
	5.2 ... multiple eligible outcome measurements (e.g. scales, definitions, time points) within the outcome domain?			PY
	5.3 ... multiple eligible analyses of the data?			N
	Risk of bias judgement			Some concerns	No pre-registered protocol; additional biochemical outcomes (serum calcium, bilirubin) appear exploratory and not pre-specified.
Overall bias	Risk of bias judgement			Some concerns	Some concerns in Domains 1, 4, and 5. Randomisation adequately described but concealment unclear; assessor blinding not confirmed; some exploratory outcome reporting.
Unique ID	ROB2_MM_10	Study ID	Wattanathorn et al., 2008	Assessor	HS
Ref or Label	Wattanathorn et al., 2008	Aim	assignment to intervention (the 'intention-to-treat' effect)
Experimental	Centella asiatica	Comparator	Placebo	Source	Journal article(s)
Outcome	Working memory & reaction time	Results	Reaction time ↓ (P<0.05 at 750 mg)	Weight	1
Domain	Signalling question			Response	Comments
Bias arising from the randomization process	1.1 Was the allocation sequence random?			Y
	1.2 Was the allocation sequence concealed until participants were enrolled and assigned to interventions?			NI
	1.3 Did baseline differences between intervention groups suggest a problem with the randomization process?			N
	Risk of bias judgement			Some concerns	Randomisation stated; method of allocation concealment not described in the manuscript.
Bias due to deviations from intended interventions	2.1.Were participants aware of their assigned intervention during the trial?			Y
	2.2.Were carers and people delivering the interventions aware of participants' assigned intervention during the trial?			N
	2.3. If Y/PY/NI to 2.1 or 2.2: Were there deviations from the intended intervention that arose because of the experimental context?			NI
	2.4 If Y/PY to 2.3: Were these deviations likely to have affected the outcome?			NA
	2.5. If Y/PY/NI to 2.4: Were these deviations from intended intervention balanced between groups?			NA
	2.6 Was an appropriate analysis used to estimate the effect of assignment to intervention?			NI
	2.7 If N/PN/NI to 2.6: Was there potential for a substantial impact (on the result) of the failure to analyse participants in the group to which they were randomized?			N
	Risk of bias judgement			Low	Double-blind; identical capsule appearance; all participants and personnel blinded; no protocol deviations reported.
Bias due to missing outcome data	3.1 Were data for this outcome available for all, or nearly all, participants randomized?			Y
	3.2 If N/PN/NI to 3.1: Is there evidence that result was not biased by missing outcome data?			NA
	3.3 If N/PN to 3.2: Could missingness in the outcome depend on its true value?			NA
	3.4 If Y/PY/NI to 3.3: Is it likely that missingness in the outcome depended on its true value?			NA
	Risk of bias judgement			Low	All 28 participants completed 2 months; no dropouts; complete data for all enrolled participants.
Bias in measurement of the outcome	4.1 Was the method of measuring the outcome inappropriate?			N
	4.2 Could measurement or ascertainment of the outcome have differed between intervention groups?			N
	4.3 Were outcome assessors aware of the intervention received by study participants?			N
	4.4 If Y/PY/NI to 4.3: Could assessment of the outcome have been influenced by knowledge of intervention received?			NA
	4.5 If Y/PY/NI to 4.4: Is it likely that assessment of the outcome was influenced by knowledge of intervention received?			NA
	Risk of bias judgement			Low	ERP (N100) is an objective neurophysiological measure; reaction time measured via computerised system; assessors blinded to condition.
Bias in selection of the reported result	5.1 Were the data that produced this result analysed in accordance with a pre-specified analysis plan that was finalized before unblinded outcome data were available for analysis?			NI
	5.2 ... multiple eligible outcome measurements (e.g. scales, definitions, time points) within the outcome domain?			PY
	5.3 ... multiple eligible analyses of the data?			N
	Risk of bias judgement			Some concerns	No pre-registered protocol; multiple ERP parameters measured and not all reported; primary outcome (reaction time vs N100) not clearly pre-specified.
Overall bias	Risk of bias judgement			Some concerns	Some concerns in Domains 1 and 5. Allocation concealment unclear; multiple ERP outcomes with selective reporting. Blinding, missing data, and measurement domains Low.
Unique ID	ROB2_MM_11	Study ID	Fitriana et al., 2021	Assessor	HS
Ref or Label	Fitriana et al., 2021	Aim	assignment to intervention (the 'intention-to-treat' effect)
Experimental	Centella asiatica	Comparator	Placebo	Source	Journal article(s)
Outcome	Memory	Results	Memory ↑ (P=0.001)	Weight	1
Domain	Signalling question			Response	Comments
Bias arising from the randomization process	1.1 Was the allocation sequence random?			Y
	1.2 Was the allocation sequence concealed until participants were enrolled and assigned to interventions?			Y
	1.3 Did baseline differences between intervention groups suggest a problem with the randomization process?			N
	Risk of bias judgement			Low	Randomisation described; allocation by sealed envelope; baseline characteristics balanced across four arms.
Bias due to deviations from intended interventions	2.1.Were participants aware of their assigned intervention during the trial?			PY
	2.2.Were carers and people delivering the interventions aware of participants' assigned intervention during the trial?			N
	2.3. If Y/PY/NI to 2.1 or 2.2: Were there deviations from the intended intervention that arose because of the experimental context?			NI
	2.4 If Y/PY to 2.3: Were these deviations likely to have affected the outcome?			NA
	2.5. If Y/PY/NI to 2.4: Were these deviations from intended intervention balanced between groups?			NA
	2.6 Was an appropriate analysis used to estimate the effect of assignment to intervention?			NI
	2.7 If N/PN/NI to 2.6: Was there potential for a substantial impact (on the result) of the failure to analyse participants in the group to which they were randomized?			N
	Risk of bias judgement			Low	Blinding of participants to supplement (CA vs. placebo) maintained; blinding to exercise allocation not possible by design; assessors blinded.
Bias due to missing outcome data	3.1 Were data for this outcome available for all, or nearly all, participants randomized?			Y
	3.2 If N/PN/NI to 3.1: Is there evidence that result was not biased by missing outcome data?			NA
	3.3 If N/PN to 3.2: Could missingness in the outcome depend on its true value?			NA
	3.4 If Y/PY/NI to 3.3: Is it likely that missingness in the outcome depended on its true value?			NA
	Risk of bias judgement			Low	All 62 participants completed 24 weeks; complete data across all four arms; CONSORT flow provided.
Bias in measurement of the outcome	4.1 Was the method of measuring the outcome inappropriate?			N
	4.2 Could measurement or ascertainment of the outcome have differed between intervention groups?			N
	4.3 Were outcome assessors aware of the intervention received by study participants?			N
	4.4 If Y/PY/NI to 4.3: Could assessment of the outcome have been influenced by knowledge of intervention received?			NA
	4.5 If Y/PY/NI to 4.4: Is it likely that assessment of the outcome was influenced by knowledge of intervention received?			NA
	Risk of bias judgement			Low	SOD assayed in blinded laboratory; memory assessed by blinded evaluator; standardised instruments across groups.
Bias in selection of the reported result	5.1 Were the data that produced this result analysed in accordance with a pre-specified analysis plan that was finalized before unblinded outcome data were available for analysis?			Y
	5.2 ... multiple eligible outcome measurements (e.g. scales, definitions, time points) within the outcome domain?			N
	5.3 ... multiple eligible analyses of the data?			N
	Risk of bias judgement			Low	Primary outcomes (memory, SOD) pre-specified; all four arms fully reported; no selective outcome reporting identified.
Overall bias	Risk of bias judgement			Low	Well-conducted 4-arm RCT. Partial performance bias (exercise arm blinding impossible by design) but supplement blinding maintained and assessors blinded. All domains Low.
Unique ID	ROB2_MM_12	Study ID	Mastroiacovo_2014	Assessor	HS
Ref or Label	Mastroiacovo_2014	Aim	assignment to intervention (the 'intention-to-treat' effect)
Experimental	Cocoa extract	Comparator	Low-flavanol control	Source	Journal article(s)
Outcome	Executive function (TMT)	Results	TMT-A −8.6 vs −0.8; TMT-B −29.23 vs +3.83 (P<0.0001)	Weight	1
Domain	Signalling question			Response	Comments
Bias arising from the randomization process	1.1 Was the allocation sequence random?			Y
	1.2 Was the allocation sequence concealed until participants were enrolled and assigned to interventions?			Y
	1.3 Did baseline differences between intervention groups suggest a problem with the randomization process?			N
	Risk of bias judgement			Low	Computer-generated stratified randomisation; sealed numbered envelopes held by independent statistician; baseline characteristics balanced.
Bias due to deviations from intended interventions	2.1.Were participants aware of their assigned intervention during the trial?			Y
	2.2.Were carers and people delivering the interventions aware of participants' assigned intervention during the trial?			N
	2.3. If Y/PY/NI to 2.1 or 2.2: Were there deviations from the intended intervention that arose because of the experimental context?			N
	2.4 If Y/PY to 2.3: Were these deviations likely to have affected the outcome?			NA
	2.5. If Y/PY/NI to 2.4: Were these deviations from intended intervention balanced between groups?			NA
	2.6 Was an appropriate analysis used to estimate the effect of assignment to intervention?			Y
	2.7 If N/PN/NI to 2.6: Was there potential for a substantial impact (on the result) of the failure to analyse participants in the group to which they were randomized?			NA
	Risk of bias judgement			Low	Double-blind; matched flavanol drink (colour, taste, appearance identical); no protocol deviations; all three arms maintained blinding throughout.
Bias due to missing outcome data	3.1 Were data for this outcome available for all, or nearly all, participants randomized?			Y
	3.2 If N/PN/NI to 3.1: Is there evidence that result was not biased by missing outcome data?			NA
	3.3 If N/PN to 3.2: Could missingness in the outcome depend on its true value?			NA
	3.4 If Y/PY/NI to 3.3: Is it likely that missingness in the outcome depended on its true value?			NA
	Risk of bias judgement			Low	All 90 participants completed 8 weeks; no dropouts; full ITT analysis; complete data for all randomised participants.
Bias in measurement of the outcome	4.1 Was the method of measuring the outcome inappropriate?			N
	4.2 Could measurement or ascertainment of the outcome have differed between intervention groups?			N
	4.3 Were outcome assessors aware of the intervention received by study participants?			N
	4.4 If Y/PY/NI to 4.3: Could assessment of the outcome have been influenced by knowledge of intervention received?			NA
	4.5 If Y/PY/NI to 4.4: Is it likely that assessment of the outcome was influenced by knowledge of intervention received?			NA
	Risk of bias judgement			Low	TMT-A/B and VFT are validated standardised instruments; administered by blinded neuropsychologists; identical procedures across all three arms.
Bias in selection of the reported result	5.1 Were the data that produced this result analysed in accordance with a pre-specified analysis plan that was finalized before unblinded outcome data were available for analysis?			Y
	5.2 ... multiple eligible outcome measurements (e.g. scales, definitions, time points) within the outcome domain?			N
	5.3 ... multiple eligible analyses of the data?			N
	Risk of bias judgement			Low	CoCoA study pre-registered; primary (TMT-A/B, VFT) and secondary outcomes pre-specified; all outcomes reported; null results for some secondary outcomes also reported.
Overall bias	Risk of bias judgement			Low	Exemplary double-blind 3-arm RCT with robust allocation concealment, pre-registration, blinded assessment, complete data, and pre-specified outcomes. All five domains Low.
Unique ID	ROB2_MM_13	Study ID	Baker et al., 2022	Assessor	HS
Ref or Label	Baker et al., 2022	Aim	assignment to intervention (the 'intention-to-treat' effect)
Experimental	Cocoa extract	Comparator	Placebo	Source	Journal article(s)
Outcome	Global cognition	Results	Mean diff +0.03 (95% CI −0.02–0.08; P=0.28)	Weight	1
Domain	Signalling question			Response	Comments
Bias arising from the randomization process	1.1 Was the allocation sequence random?			Y
	1.2 Was the allocation sequence concealed until participants were enrolled and assigned to interventions?			Y
	1.3 Did baseline differences between intervention groups suggest a problem with the randomization process?			N
	Risk of bias judgement			Low	Centrally computer-generated randomisation (NHLBI infrastructure); concealment robust via central allocation; large stratified design (n=2262).
Bias due to deviations from intended interventions	2.1.Were participants aware of their assigned intervention during the trial?			Y
	2.2.Were carers and people delivering the interventions aware of participants' assigned intervention during the trial?			N
	2.3. If Y/PY/NI to 2.1 or 2.2: Were there deviations from the intended intervention that arose because of the experimental context?			N
	2.4 If Y/PY to 2.3: Were these deviations likely to have affected the outcome?			NA
	2.5. If Y/PY/NI to 2.4: Were these deviations from intended intervention balanced between groups?			NA
	2.6 Was an appropriate analysis used to estimate the effect of assignment to intervention?			Y
	2.7 If N/PN/NI to 2.6: Was there potential for a substantial impact (on the result) of the failure to analyse participants in the group to which they were randomized?			NA
	Risk of bias judgement			Low	Double-blind; indistinguishable capsules; central management prevented unblinding; no protocol deviations reported at 3-year follow-up.
Bias due to missing outcome data	3.1 Were data for this outcome available for all, or nearly all, participants randomized?			Y
	3.2 If N/PN/NI to 3.1: Is there evidence that result was not biased by missing outcome data?			NA
	3.3 If N/PN to 3.2: Could missingness in the outcome depend on its true value?			NA
	3.4 If Y/PY/NI to 3.3: Is it likely that missingness in the outcome depended on its true value?			NA
	Risk of bias judgement			Low	Large ITT population (n=2262); minimal differential dropout; full CONSORT flow; sensitivity analysis for missing data provided.
Bias in measurement of the outcome	4.1 Was the method of measuring the outcome inappropriate?			N
	4.2 Could measurement or ascertainment of the outcome have differed between intervention groups?			N
	4.3 Were outcome assessors aware of the intervention received by study participants?			N
	4.4 If Y/PY/NI to 4.3: Could assessment of the outcome have been influenced by knowledge of intervention received?			NA
	4.5 If Y/PY/NI to 4.4: Is it likely that assessment of the outcome was influenced by knowledge of intervention received?			NA
	Risk of bias judgement			Low	Telephone-based validated cognitive battery (TICS-m, HVLT, DSST); blinded assessors; standardised administration across all sites.
Bias in selection of the reported result	5.1 Were the data that produced this result analysed in accordance with a pre-specified analysis plan that was finalized before unblinded outcome data were available for analysis?			Y
	5.2 ... multiple eligible outcome measurements (e.g. scales, definitions, time points) within the outcome domain?			N
	5.3 ... multiple eligible analyses of the data?			N
	Risk of bias judgement			Low	Pre-registered ClinicalTrials.gov (NCT02422745); published SAP; all primary and secondary outcomes reported; null result fully and transparently reported.
Overall bias	Risk of bias judgement			Low	Highest-quality RCT in this review. Large, pre-registered, centrally randomised, double-blind trial with complete outcome reporting. All five domains Low.
Unique ID	ROB2_MM_14	Study ID	Desideri et al., 2012	Assessor	HS
Ref or Label	Desideri et al., 2012	Aim	assignment to intervention (the 'intention-to-treat' effect)
Experimental	Cocoa extract	Comparator	Low-flavanol control	Source	Journal article(s)
Outcome	Executive function	Results	TMT improvements (P<0.0001); dose-dependent	Weight	1
Domain	Signalling question			Response	Comments
Bias arising from the randomization process	1.1 Was the allocation sequence random?			Y
	1.2 Was the allocation sequence concealed until participants were enrolled and assigned to interventions?			Y
	1.3 Did baseline differences between intervention groups suggest a problem with the randomization process?			N
	Risk of bias judgement			Low	Same CoCoA trial protocol as Mastroiacovo 2014; computer-generated randomisation; sealed envelope allocation by independent statistician.
Bias due to deviations from intended interventions	2.1.Were participants aware of their assigned intervention during the trial?			Y
	2.2.Were carers and people delivering the interventions aware of participants' assigned intervention during the trial?			N
	2.3. If Y/PY/NI to 2.1 or 2.2: Were there deviations from the intended intervention that arose because of the experimental context?			PN
	2.4 If Y/PY to 2.3: Were these deviations likely to have affected the outcome?			NA
	2.5. If Y/PY/NI to 2.4: Were these deviations from intended intervention balanced between groups?			NA
	2.6 Was an appropriate analysis used to estimate the effect of assignment to intervention?			Y
	2.7 If N/PN/NI to 2.6: Was there potential for a substantial impact (on the result) of the failure to analyse participants in the group to which they were randomized?			NA
	Risk of bias judgement			Low	Double-blind; matched flavanol drink; no protocol deviations; same blinding procedures as Mastroiacovo 2014.
Bias due to missing outcome data	3.1 Were data for this outcome available for all, or nearly all, participants randomized?			Y
	3.2 If N/PN/NI to 3.1: Is there evidence that result was not biased by missing outcome data?			NA
	3.3 If N/PN to 3.2: Could missingness in the outcome depend on its true value?			NA
	3.4 If Y/PY/NI to 3.3: Is it likely that missingness in the outcome depended on its true value?			NA
	Risk of bias judgement			Low	All 90 participants completed 8 weeks; complete ITT dataset; no differential dropout.
Bias in measurement of the outcome	4.1 Was the method of measuring the outcome inappropriate?			N
	4.2 Could measurement or ascertainment of the outcome have differed between intervention groups?			N
	4.3 Were outcome assessors aware of the intervention received by study participants?			N
	4.4 If Y/PY/NI to 4.3: Could assessment of the outcome have been influenced by knowledge of intervention received?			NA
	4.5 If Y/PY/NI to 4.4: Is it likely that assessment of the outcome was influenced by knowledge of intervention received?			NA
	Risk of bias judgement			Low	TMT-A/B and VFT validated; blood pressure and HOMA-IR measured by blinded clinical staff; standardised procedures.
Bias in selection of the reported result	5.1 Were the data that produced this result analysed in accordance with a pre-specified analysis plan that was finalized before unblinded outcome data were available for analysis?			Y
	5.2 ... multiple eligible outcome measurements (e.g. scales, definitions, time points) within the outcome domain?			N
	5.3 ... multiple eligible analyses of the data?			N
	Risk of bias judgement			Low	Pre-registered CoCoA protocol; metabolic and cognitive outcomes pre-specified; all outcomes reported including dose-response relationships.
Overall bias	Risk of bias judgement			Low	Same high-quality protocol as Mastroiacovo 2014 (CoCoA study). All five domains Low. Different primary outcome focus (vascular/metabolic) but identical methodological rigour.
Unique ID	ROB2_MM_15	Study ID	Field et al., 2011	Assessor	HS
Ref or Label	Field et al., 2011	Aim	assignment to intervention (the 'intention-to-treat' effect)
Experimental	Cocoa extract	Comparator	Placebo	Source	Journal article(s)
Outcome	Working memory	Results	WM accuracy ↑ (P<0.05)	Weight	1
Domain	Signalling question			Response	Comments
Bias arising from the randomization process	1.1 Was the allocation sequence random?			Y
	1.2 Was the allocation sequence concealed until participants were enrolled and assigned to interventions?			Y
	1.3 Did baseline differences between intervention groups suggest a problem with the randomization process?			N
	Risk of bias judgement			Low	Crossover; condition order counterbalanced and randomised; 1-week washout; baseline cognitive performance comparable.
Bias due to deviations from intended interventions	2.1.Were participants aware of their assigned intervention during the trial?			Y
	2.2.Were carers and people delivering the interventions aware of participants' assigned intervention during the trial?			N
	2.3. If Y/PY/NI to 2.1 or 2.2: Were there deviations from the intended intervention that arose because of the experimental context?			N
	2.4 If Y/PY to 2.3: Were these deviations likely to have affected the outcome?			NA
	2.5. If Y/PY/NI to 2.4: Were these deviations from intended intervention balanced between groups?			NA
	2.6 Was an appropriate analysis used to estimate the effect of assignment to intervention?			Y
	2.7 If N/PN/NI to 2.6: Was there potential for a substantial impact (on the result) of the failure to analyse participants in the group to which they were randomized?			NA
	Risk of bias judgement			Low	Double-blind; white chocolate control matched for appearance and taste; no carryover effects; washout adequate.
Bias due to missing outcome data	3.1 Were data for this outcome available for all, or nearly all, participants randomized?			Y
	3.2 If N/PN/NI to 3.1: Is there evidence that result was not biased by missing outcome data?			NA
	3.3 If N/PN to 3.2: Could missingness in the outcome depend on its true value?			NA
	3.4 If Y/PY/NI to 3.3: Is it likely that missingness in the outcome depended on its true value?			NA
	Risk of bias judgement			Low	Acute crossover design; all 30 participants completed both conditions; no missing data.
Bias in measurement of the outcome	4.1 Was the method of measuring the outcome inappropriate?			N
	4.2 Could measurement or ascertainment of the outcome have differed between intervention groups?			N
	4.3 Were outcome assessors aware of the intervention received by study participants?			N
	4.4 If Y/PY/NI to 4.3: Could assessment of the outcome have been influenced by knowledge of intervention received?			NA
	4.5 If Y/PY/NI to 4.4: Is it likely that assessment of the outcome was influenced by knowledge of intervention received?			NA
	Risk of bias judgement			Low	Computerised visual and cognitive battery; objective measurements; assessors and participants blinded to condition; identical test procedures.
Bias in selection of the reported result	5.1 Were the data that produced this result analysed in accordance with a pre-specified analysis plan that was finalized before unblinded outcome data were available for analysis?			PY
	5.2 ... multiple eligible outcome measurements (e.g. scales, definitions, time points) within the outcome domain?			N
	5.3 ... multiple eligible analyses of the data?			N
	Risk of bias judgement			Low	No pre-registered protocol; some secondary visual outcomes appear exploratory; spatial WM and reaction time primary outcomes consistently reported.
Overall bias	Risk of bias judgement			Low	Well-designed acute crossover RCT with good blinding and complete data. Some concerns in Domain 5 (absence of pre-registration; some exploratory secondary visual outcomes).
Unique ID	ROB2_MM_16	Study ID	Suominen et al., 2020	Assessor	HS
Ref or Label	Suominen et al., 2020	Aim	assignment to intervention (the 'intention-to-treat' effect)
Experimental	Dark chocolate	Comparator	Control	Source	Journal article(s)
Outcome	Executive function	Results	TMT-A/B NS (P=0.93; P=0.66)	Weight	1
Domain	Signalling question			Response	Comments
Bias arising from the randomization process	1.1 Was the allocation sequence random?			Y
	1.2 Was the allocation sequence concealed until participants were enrolled and assigned to interventions?			Y
	1.3 Did baseline differences between intervention groups suggest a problem with the randomization process?			N
	Risk of bias judgement			Low	Computer-generated randomisation (FlaSeCo protocol); allocation managed by independent pharmacist; baseline characteristics balanced.
Bias due to deviations from intended interventions	2.1.Were participants aware of their assigned intervention during the trial?			Y
	2.2.Were carers and people delivering the interventions aware of participants' assigned intervention during the trial?			N
	2.3. If Y/PY/NI to 2.1 or 2.2: Were there deviations from the intended intervention that arose because of the experimental context?			N
	2.4 If Y/PY to 2.3: Were these deviations likely to have affected the outcome?			NA
	2.5. If Y/PY/NI to 2.4: Were these deviations from intended intervention balanced between groups?			NA
	2.6 Was an appropriate analysis used to estimate the effect of assignment to intervention?			Y
	2.7 If N/PN/NI to 2.6: Was there potential for a substantial impact (on the result) of the failure to analyse participants in the group to which they were randomized?			NA
	Risk of bias judgement			Low	Double-blind; matched chocolate drinks (colour, taste, appearance); pharmacist-blinded dispensing; no protocol deviations.
Bias due to missing outcome data	3.1 Were data for this outcome available for all, or nearly all, participants randomized?			Y
	3.2 If N/PN/NI to 3.1: Is there evidence that result was not biased by missing outcome data?			NA
	3.3 If N/PN to 3.2: Could missingness in the outcome depend on its true value?			NA
	3.4 If Y/PY/NI to 3.3: Is it likely that missingness in the outcome depended on its true value?			NA
	Risk of bias judgement			Low	Full CONSORT flow; 100 completers; minimal dropout; ITT analysis; sensitivity analyses for missing data provided.
Bias in measurement of the outcome	4.1 Was the method of measuring the outcome inappropriate?			N
	4.2 Could measurement or ascertainment of the outcome have differed between intervention groups?			N
	4.3 Were outcome assessors aware of the intervention received by study participants?			N
	4.4 If Y/PY/NI to 4.3: Could assessment of the outcome have been influenced by knowledge of intervention received?			NA
	4.5 If Y/PY/NI to 4.4: Is it likely that assessment of the outcome was influenced by knowledge of intervention received?			NA
	Risk of bias judgement			Low	TMT-A/B and VFT are validated; administered by blinded neuropsychologists; identical procedures across arms.
Bias in selection of the reported result	5.1 Were the data that produced this result analysed in accordance with a pre-specified analysis plan that was finalized before unblinded outcome data were available for analysis?			Y
	5.2 ... multiple eligible outcome measurements (e.g. scales, definitions, time points) within the outcome domain?			N
	5.3 ... multiple eligible analyses of the data?			N
	Risk of bias judgement			Low	Pre-registered ClinicalTrials.gov; published SAP; all primary and secondary outcomes reported; null results transparently reported with 95%CIs.
Overall bias	Risk of bias judgement			Low	High-quality double-blind RCT with pre-registration, robust blinding, ITT analysis, and transparent null result reporting. All five domains Low.
Unique ID	ROB2_MM_17	Study ID	Bell et al., 2021	Assessor	HS
Ref or Label	Bell et al., 2021	Aim	assignment to intervention (the 'intention-to-treat' effect)
Experimental	β-caryophyllene	Comparator	Placebo	Source	Journal article(s)
Outcome	Memory	Results	Memory ↑ (P<0.05); CFQ ↓ 27–36% (P≤0.05)	Weight	1
Domain	Signalling question			Response	Comments
Bias arising from the randomization process	1.1 Was the allocation sequence random?			NI
	1.2 Was the allocation sequence concealed until participants were enrolled and assigned to interventions?			NI
	1.3 Did baseline differences between intervention groups suggest a problem with the randomization process?			N
	Risk of bias judgement			Some concerns	Randomised double-blind stated; randomisation method and allocation concealment not described in the available publication.
Bias due to deviations from intended interventions	2.1.Were participants aware of their assigned intervention during the trial?			Y
	2.2.Were carers and people delivering the interventions aware of participants' assigned intervention during the trial?			N
	2.3. If Y/PY/NI to 2.1 or 2.2: Were there deviations from the intended intervention that arose because of the experimental context?			N
	2.4 If Y/PY to 2.3: Were these deviations likely to have affected the outcome?			NA
	2.5. If Y/PY/NI to 2.4: Were these deviations from intended intervention balanced between groups?			NA
	2.6 Was an appropriate analysis used to estimate the effect of assignment to intervention?			NI
	2.7 If N/PN/NI to 2.6: Was there potential for a substantial impact (on the result) of the failure to analyse participants in the group to which they were randomized?			PN
	Risk of bias judgement			Some concerns	Double-blind stated; identical capsule appearance; no deviations from protocol reported.
Bias due to missing outcome data	3.1 Were data for this outcome available for all, or nearly all, participants randomized?			Y
	3.2 If N/PN/NI to 3.1: Is there evidence that result was not biased by missing outcome data?			NA
	3.3 If N/PN to 3.2: Could missingness in the outcome depend on its true value?			NA
	3.4 If Y/PY/NI to 3.3: Is it likely that missingness in the outcome depended on its true value?			NA
	Risk of bias judgement			Low	All 52 participants completed 8 weeks; no dropouts reported; complete data available.
Bias in measurement of the outcome	4.1 Was the method of measuring the outcome inappropriate?			N
	4.2 Could measurement or ascertainment of the outcome have differed between intervention groups?			N
	4.3 Were outcome assessors aware of the intervention received by study participants?			NI
	4.4 If Y/PY/NI to 4.3: Could assessment of the outcome have been influenced by knowledge of intervention received?			NI
	4.5 If Y/PY/NI to 4.4: Is it likely that assessment of the outcome was influenced by knowledge of intervention received?			PN
	Risk of bias judgement			Some concerns	CFQ is a validated self-report scale; memory test used not clearly specified; assessor blinding not explicitly confirmed.
Bias in selection of the reported result	5.1 Were the data that produced this result analysed in accordance with a pre-specified analysis plan that was finalized before unblinded outcome data were available for analysis?			N
	5.2 ... multiple eligible outcome measurements (e.g. scales, definitions, time points) within the outcome domain?			PY
	5.3 ... multiple eligible analyses of the data?			N
	Risk of bias judgement			Some concerns	No pre-registered protocol; multiple CFQ subscales reported with unclear pre-specification; selective emphasis on subscales showing largest effects.
Overall bias	Risk of bias judgement			Some concerns	Some concerns across Domains 1, 4, and 5. Randomisation method not reported; measurement instrument for memory not clearly specified; no pre-registration. Full blinding and complete data low risk.
