# Supplementary material
Source: Research Square preprint supplement (doi:10.21203/rs.3.rs-9906053/v1)
Supplement: Supplementary file 2 [file e7371ea161c2f17a54d17246.docx]

**SYSTEMATIC REVIEW PROTOCOL**

**Review Title**

**Cognitive effects of nutraceutical chocolate-based formulations enriched with *Bacopa monnieri*, *Centella asiatica*, and cocoa (*Theobroma cacao*) flavanols: a systematic review of neurobiological mechanisms and clinical evidence**

**Background and Rationale**

Age-related cognitive decline, stress-associated memory disturbances, reduced executive functioning, neurovascular dysfunction, and progressive neurodegenerative disorders increasingly affect global populations. Alongside pharmaceutical approaches, there is growing interest in nutraceutical and food-based interventions that may support memory, attention, learning, processing speed, and long-term brain health.

Among widely used botanical and functional food ingredients, *Bacopa monnieri* and *Centella asiatica* have long histories of traditional use in Ayurvedic medicine as cognitive tonics. Modern experimental studies suggest antioxidant, anti-inflammatory, cholinergic, neurotrophic, anxiolytic, and synaptic plasticity–enhancing effects. Separately, cocoa (*Theobroma cacao*) flavanols have been investigated for vascular, endothelial, metabolic, and neurocognitive benefits, including potential improvements in cerebral blood flow and executive function.

Commercial functional chocolate products increasingly combine these ingredients in a cocoa-based delivery system (for example, herbal chocolate formulations containing *Bacopa monnieri* and *Centella asiatica*). However, the extent and quality of evidence supporting their combined or ingredient-specific cognitive effects remain unclear.

A systematic review is therefore required to synthesize available human clinical evidence and mechanistic preclinical data relating to cognition and neurobiological function.

**Review Question**

What is the current evidence regarding the cognitive and neuroprotective effects of chocolate-based nutraceutical formulations enriched with *Bacopa monnieri*, *Centella asiatica*, cocoa flavanols, or their related bioactive constituents?

**Objectives**

**Primary Objective**

To systematically evaluate evidence regarding the effects of these ingredients on cognition, including:

- Memory
- Learning
- Attention
- Executive function
- Processing speed
- Global cognition

**Secondary Objectives**

1. To evaluate mechanistic pathways linked to cognitive outcomes, including:

- Cerebral blood flow
- Neuroinflammation
- Oxidative stress
- Cholinergic signaling
- Synaptic plasticity
- Neurogenesis
- Neurotrophic signaling (e.g., BDNF)

1. To compare evidence strength across ingredients.
2. To assess whether combination formulations demonstrate plausible additive or synergistic mechanisms.

**Eligibility Criteria**

**Population**

**Human Studies**

- Healthy adults
- Older adults
- Individuals with subjective cognitive complaints
- Mild cognitive impairment
- Dementia or early neurodegenerative states
- Students or cognitively stressed populations

**Preclinical Studies**

- Animal models relevant to cognition or neurodegeneration
- In vitro neuronal, glial, vascular, or mechanistic models

**Interventions / Exposures**

Studies investigating one or more of the following:

- *Bacopa monnieri* extract
- *Centella asiatica* extract
- Cocoa flavanols
- Dark chocolate with quantified flavanol content
- Chocolate-based herbal formulations containing above ingredients
- Relevant isolated bioactives (e.g., bacosides, asiaticoside, epicatechin, β-caryophyllene)

**Comparators**

- Placebo
- Low-flavanol control
- Standard diet
- Untreated controls
- Vehicle controls
- Comparator nutraceutical interventions

**Study Designs Included**

**Human Evidence**

- Randomized controlled trials
- Double-blind placebo-controlled trials
- Controlled clinical trials
- Prospective cohort studies (if relevant)

**Mechanistic Evidence**

- Animal intervention studies
- In vitro mechanistic studies

**Exclusion Criteria**

- Narrative reviews
- Systematic reviews
- Conference abstracts without full data
- Case reports
- Editorials
- Non-peer-reviewed sources (except hand-searched preprints if necessary and clearly labelled)
- Studies lacking relevant cognitive or neurobiological outcomes
- Non-English studies where translation is unavailable

**Search Strategy**

A systematic search will be conducted in:

- PubMed/MEDLINE
- Scopus
- Web of Science
- Cochrane CENTRAL
- Google Scholar (supplementary search)

**Proposed Date Range**

**January 2006 to April 2026**

**Example Search Terms**

("Bacopa monnieri" OR bacopa) AND Memory

("Bacopa monnieri" OR bacopa) AND cognition

("Bacopa monnieri" OR bacopa) AND Learning

("Bacopa monnieri" OR bacopa) AND Attention

("Bacopa monnieri" OR bacopa) AND Executive function

("Bacopa monnieri" OR bacopa) AND Processing speed

("Bacopa monnieri" OR bacopa) AND neuroprotection

("Centella asiatica" OR gotu kola) AND Memory

("Centella asiatica" OR gotu kola) AND cognition

("Centella asiatica" OR gotu kola) AND Learning

("Centella asiatica" OR gotu kola) AND Attention

("Centella asiatica" OR gotu kola) AND Executive function

("Centella asiatica" OR gotu kola) AND Processing speed

("Centella asiatica" OR gotu kola) AND neuroprotection

(cocoa flavanols OR dark chocolate OR Theobroma cacao) AND Memory

(cocoa flavanols OR dark chocolate OR Theobroma cacao) AND cognition

(cocoa flavanols OR dark chocolate OR Theobroma cacao) AND Learning

(cocoa flavanols OR dark chocolate OR Theobroma cacao) AND Attention

(cocoa flavanols OR dark chocolate OR Theobroma cacao) AND Executive function

(cocoa flavanols OR dark chocolate OR Theobroma cacao) AND Processing speed

(cocoa flavanols OR dark chocolate OR Theobroma cacao) AND neuroprotection

(Bacopa AND Centella AND chocolate)

Search strings will be adapted for each database.

**Outcomes**

**Primary Outcomes**

Validated cognitive outcomes:

- Rey Auditory Verbal Learning Test
- Trail Making Test A/B
- Working memory tasks
- Stroop test
- Reaction time
- Verbal fluency
- MMSE / MoCA / global cognition scales

**Secondary Outcomes**

Biological / mechanistic outcomes:

- Cerebral blood flow
- Endothelial function
- Oxidative stress markers
- Inflammatory cytokines
- BDNF
- Acetylcholinesterase activity
- Synaptic proteins
- Neurogenesis markers

**Study Selection Process**

1. Titles and abstracts will be screened independently.
2. Full texts of potentially eligible studies will be reviewed.
3. Reasons for exclusion will be documented.
4. PRISMA flow diagram will be prepared.

**Data Extraction**

The following data will be extracted:

- Author / year
- Country
- Study design
- Population characteristics
- Sample size
- Intervention composition
- Dose and duration
- Comparator
- Cognitive outcomes
- Mechanistic outcomes
- Main findings
- Limitations

**Risk of Bias Assessment**

**Human RCTs**

Cochrane Risk of Bias tool (RoB 2)

**Observational Studies**

Newcastle-Ottawa Scale (if used)

**Animal Studies**

SYRCLE Risk of Bias tool

**In Vitro Studies**

Methodological quality will be narratively assessed.

**Data Synthesis**

Due to anticipated heterogeneity in:

- Interventions
- Doses
- Populations
- Outcome measures
- Study durations

A **narrative synthesis** will be the primary method.

If sufficient homogeneous data are available, meta-analysis may be considered using random-effects modelling.

**Subgroup Analyses (if feasible)**

- Ingredient type (*Bacopa*, *Centella*, cocoa)
- Healthy vs impaired cognition
- Acute vs chronic supplementation
- Younger vs older adults
- Low vs high dose flavanol interventions

**Sensitivity Analyses**

Where data permit:

- Excluding high-risk bias studies
- Excluding small studies
- Excluding mixed multi-ingredient products

**Dissemination Plans**

Results will be submitted to a peer-reviewed journal in the field of nutrition, supplements, neuroscience, or functional foods (target journals may include Taylor & Francis titles such as *Journal of Dietary Supplements*).

A preprint may also be posted prior to journal publication.

**Timeline**

| **Activity** | **Estimated Time** |
| --- | --- |
| Final search | 3 days |
| Screening | 2 days |
| Data extraction | 1 week |
| Bias assessment | 1 week |
| Writing | 1 week |
| Submission | Within 1 month |

**Review Team**

Lead Reviewer: Dr. Haily Seneviratne
Affiliation: Wayamba University of Sri Lanka
Country: Sri Lanka

Additional reviewers may be added during final submission.

**Conflicts of Interest**

The reviewers declare no known conflicts of interest related to this review topic.

**Funding**

No dedicated external funding has been secured for this review at the time of protocol preparation.

**Registration Note**

This protocol is prepared for submission to **PROSPERO** and may be updated if minor methodological refinements occur before final review completion.
