# Supplementary material
Source: Research Square preprint supplement (doi:10.21203/rs.3.rs-9906053/v1)
Supplement: Supplementary file 3 [file fd3fd0a6f5d6a9251d35cc0d.docx]

| **Section and Topic** | **Item #** | **Checklist item** | **Location where item is reported** |
| --- | --- | --- | --- |
| **TITLE** | | | Title page |
| Title | 1 | Identify the report as a systematic review. | Abstract section |
| **ABSTRACT** | | |  |
| Abstract | 2 | See the PRISMA 2020 for Abstracts checklist. | Abstract section |
| **INTRODUCTION** | | |  |
| Rationale | 3 | Describe the rationale for the review in the context of existing knowledge. | Introduction section, paragraph 1 |
| Objectives | 4 | Provide an explicit statement of the objective(s) or question(s) the review addresses. | Introduction / Methods section, objectives paragraph |
| **METHODS** | | |  |
| Eligibility criteria | 5 | Specify the inclusion and exclusion criteria for the review and how studies were grouped for the syntheses. | Methods — Selection Criteria section |
| Information sources | 6 | Specify all databases, registers, websites, organisations, reference lists and other sources searched or consulted to identify studies. Specify the date when each source was last searched or consulted. | Methods — Study Protocol section and Table S2 |
| Search strategy | 7 | Present the full search strategies for all databases, registers and websites, including any filters and limits used. | Methods — Methods; supplementary (S3_systematic_review_protocol) |
| Selection process | 8 | Specify the methods used to decide whether a study met the inclusion criteria of the review, including how many reviewers screened each record and each report retrieved, whether they worked independently, and if applicable, details of automation tools used in the process. | Methods — Data Extraction section |
| Data collection process | 9 | Specify the methods used to collect data from reports, including how many reviewers collected data from each report, whether they worked independently, any processes for obtaining or confirming data from study investigators, and if applicable, details of automation tools used in the process. | Methods — Data Extraction section |
| Data items | 10a | List and define all outcomes for which data were sought. Specify whether all results that were compatible with each outcome domain in each study were sought (e.g. for all measures, time points, analyses), and if not, the methods used to decide which results to collect. | Methods — Outcomes section |
| 10b | List and define all other variables for which data were sought (e.g. participant and intervention characteristics, funding sources). Describe any assumptions made about any missing or unclear information. | Methods — Data Extraction section and Tables 1–2 |
| Study risk of bias assessment | 11 | Specify the methods used to assess risk of bias in the included studies, including details of the tool(s) used, how many reviewers assessed each study and whether they worked independently, and if applicable, details of automation tools used in the process. | Methods — Risk of Bias section: supplementary (S1_RoB2_assessment_full_details) |
| Effect measures | 12 | Specify for each outcome the effect measure(s) (e.g. risk ratio, mean difference) used in the synthesis or presentation of results. | Methods — Data Synthesis section and Table 1 |
| Synthesis methods | 13a | Describe the processes used to decide which studies were eligible for each synthesis (e.g. tabulating the study intervention characteristics and comparing against the planned groups for each synthesis (item #5)). | Methods — Data Synthesis section |
| 13b | Describe any methods required to prepare the data for presentation or synthesis, such as handling of missing summary statistics, or data conversions. | Methods — Data Extraction section |
| 13c | Describe any methods used to tabulate or visually display results of individual studies and syntheses. | Results — Tables 1–4; Figure 1 (PRISMA flow diagram) |
| 13d | Describe any methods used to synthesize results and provide a rationale for the choice(s). If meta-analysis was performed, describe the model(s), method(s) to identify the presence and extent of statistical heterogeneity, and software package(s) used. | Methods — Data Synthesis section (narrative synthesis) |
| 13e | Describe any methods used to explore possible causes of heterogeneity among study results (e.g. subgroup analysis, meta-regression). | Methods — Data Synthesis section; Results and Discussion (qualitative) |
| 13f | Describe any sensitivity analyses conducted to assess robustness of the synthesized results. | Methods — Data Synthesis section. Methods — Data Synthesis section (sensitivity analyses not conducted) |
| Reporting bias assessment | 14 | Describe any methods used to assess risk of bias due to missing results in a synthesis (arising from reporting biases). | Methods section. Methods section; Discussion — Limitations (qualitative) |
| Certainty assessment | 15 | Describe any methods used to assess certainty (or confidence) in the body of evidence for an outcome. | Methods section |
| **RESULTS** | | |  |
| Study selection | 16a | Describe the results of the search and selection process, from the number of records identified in the search to the number of studies included in the review, ideally using a flow diagram. | Results — Study Selection; Figure 1 (PRISMA flow diagram) |
| 16b | Cite studies that might appear to meet the inclusion criteria, but which were excluded, and explain why they were excluded. | Results — excluded studies list with reasons |
| Study characteristics | 17 | Cite each included study and present its characteristics. | Results — Tables 1 and 2 |
| Risk of bias in studies | 18 | Present assessments of risk of bias for each included study. | Results section — Results — Figure 2 and 3 (RoB2 ratings per study) |
| Results of individual studies | 19 | For all outcomes, present, for each study: (a) summary statistics for each group (where appropriate) and (b) an effect estimate and its precision (e.g. confidence/credible interval), ideally using structured tables or plots. | Results section — Results — Table 1 (RCTs) and Table 2 (preclinical) |
| Results of syntheses | 20a | For each synthesis, briefly summarise the characteristics and risk of bias among contributing studies. | Results — narrative synthesis paragraphs per intervention category |
| 20b | Present results of all statistical syntheses conducted. If meta-analysis was done, present for each the summary estimate and its precision (e.g. confidence/credible interval) and measures of statistical heterogeneity. If comparing groups, describe the direction of the effect. | Results — narrative synthesis; Table 3 (Cognitive Domain × Outcome Matrix) |
| 20c | Present results of all investigations of possible causes of heterogeneity among study results. | Results / Discussion — heterogeneity sources (qualitative) |
| 20d | Present results of all sensitivity analyses conducted to assess the robustness of the synthesized results. | Results / Discussion sections. Results / Discussion — qualitative sensitivity by RoB stratum Figure 2 and 3) |
| Reporting biases | 21 | Present assessments of risk of bias due to missing results (arising from reporting biases) for each synthesis assessed. | Discussion — Limitations section |
| Certainty of evidence | 22 | Present assessments of certainty (or confidence) in the body of evidence for each outcome assessed. | Results — Table 3; Discussion section |
| **DISCUSSION** | | |  |
| Discussion | 23a | Provide a general interpretation of the results in the context of other evidence. | Discussion section |
| 23b | Discuss any limitations of the evidence included in the review. | Discussion — Limitations section |
| 23c | Discuss any limitations of the review processes used. | Discussion — Limitations section |
| 23d | Discuss implications of the results for practice, policy, and future research. | Discussion — Implications and Future Directions section |
| **OTHER INFORMATION** | | |  |
| Registration and protocol | 24a | Provide registration information for the review, including register name and registration number, or state that the review was not registered. | Methods section / Title page – PROSPERO registration |
| 24b | Indicate where the review protocol can be accessed, or state that a protocol was not prepared. | Methods section – PROSPERO: supplementary (S3_systematic_review_protocol) |
| 24c | Describe and explain any amendments to information provided at registration or in the protocol. | Methods section – one protocol amendment noted |
| Support | 25 | Describe sources of financial or non-financial support for the review, and the role of the funders or sponsors in the review. | Funding / Acknowledgements section – no external funding |
| Competing interests | 26 | Declare any competing interests of review authors. | Competing Interests statement – no competing interests declared |
| Availability of data, code and other materials | 27 | Report which of the following are publicly available and where they can be found: template data collection forms; data extracted from included studies; data used for all analyses; analytic code; any other materials used in the review. | Data Availability section — materials available on request |

**Note.** Items 13e, 13f, 14, 15, 20d, and 21 are rated amber because quantitative meta-analysis was not performed (precluded by clinical and methodological heterogeneity across studies), and formal GRADE assessment of certainty was not conducted. These limitations are explicitly acknowledged in the Discussion section of the manuscript. All other PRISMA 2020 items are fully addressed.

**Checklist adapted from:** Page MJ, McKenzie JE, Bossuyt PM, Boutron I, Hoffmann TC, Mulrow CD, et al. The PRISMA 2020 statement: an updated guideline for reporting systematic reviews. BMJ 2021;372:n71. doi: 10.1136/bmj.n71. This work is licensed under CC BY 4.0. To view a copy of this license, visit <https://creativecommons.org/licenses/by/4.0/>

**Table. PRISMA checklist table.**
